# Supplementary material
Source: Springer Nature journal article supplement (https://www.springermedizin.de/resource/supplementary/12943_2013_1243_MOESM4_ESM.pdf/9553076)

a

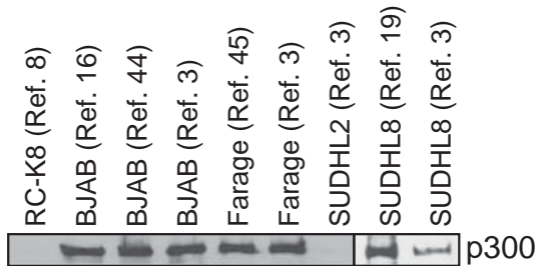

b

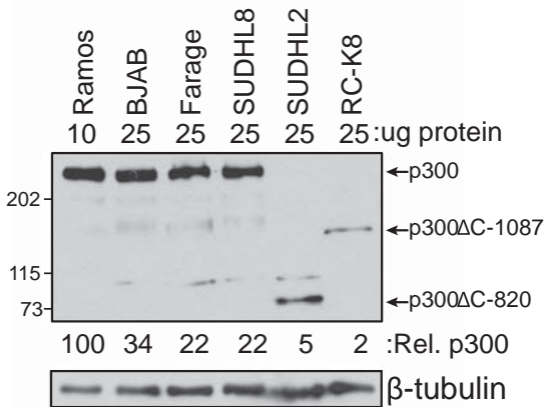

c

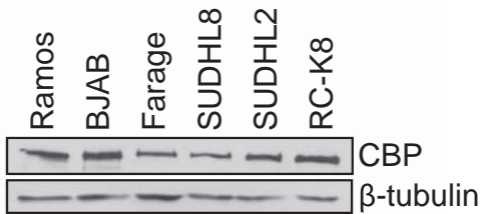

Supplement: MOESM4 [file 9553076]
